# Supplementary material
Source: MDPI journal article supplement (https://www.mdpi.com/2312-7481/9/7/178)
Supplement: s1 [file s1 › magnetochemistry-2439242-supplementary.pdf]

# Supplementary Material

## *Magnetochemistry*

### *Table of Contents*

|                                                                         |    |
|-------------------------------------------------------------------------|----|
| Materials and Methods.....                                              | 2  |
| Synthetic procedures.....                                               | 3  |
| Optical Properties.....                                                 | 6  |
| EPR spectra .....                                                       | 7  |
| Magnetic Properties .....                                               | 9  |
| X-ray Crystallography.....                                              | 10 |
| Computational Studies.....                                              | 13 |
| References.....                                                         | 17 |
| Copies of $^1\text{H}$ , $^{13}\text{C}$ NMR Spectra Mass Spectra ..... | 18 |
| Geometry Coordinates.....                                               | 21 |

## Materials and Methods

The spectroscopic experiments were conducted at room temperature using toluene as the solvent, with UV-vis absorption measurements taken using a CELHXF 300 spectrophotometer. Continuous wave (CW) X-band EPR spectra were recorded in degassed toluene with the concentration of  $10^{-4}$  M unless otherwise stated. CW-EPR measurement were performed on a CIQTEK EPR200-Plus spectrometer using CW4102CR highly sensitive EPR cavity. CIQTEK VTS-L-W2-GDC cryogenic system was used for temperature control. Corrections for g-factors were obtained using 2,2-diphenyl-1-picrylhydrazyl (with a g factor of 2.0037) as the standard, coupled with a frequency counter and liquid helium flow temperature control, and were simulated using WINEPR SimFonia (298 K) and *EasySpin* [1] in Matlab (100 K). The structures were solved by a direct method and refined by a full-matrix least-squares procedure. Variable-temperature magnetic susceptibility was measured with a Quantum Design MPMS-XL-7 SQUID magnetic susceptibility meter, under an external magnetic field of 1T, within a temperature range of 2–270 K (monoradical) and 2–300 K (diradicals). X-ray crystallographic data were obtained using a Nonius Kappa CCD diffractometer that was equipped with a graphite monochromator and utilizing Cu K $\alpha$  radiation ( $\lambda = 1.54184$  Å). The structures were solved by a direct method and refined by a full-matrix least-squares procedure. A Teflon tape, weighing approximately 10 mg, was used to wrap the sample prior to measurement in a measuring tube. The background signal from the sample holder was subtracted, and a diamagnetic correction was applied. NMR spectra were obtained using 600 MHz Bruker spectrometers, with  $^1\text{H}$  NMR recorded using  $\text{CDCl}_3$  and  $^{13}\text{C}$  NMR spectra. Chemical shifts ( $\delta$ ) were reported in parts per million (ppm) relative to TMS at 0 ppm.

The fitting of IT (I, the double integral of the EPR signal) vs. T used the modified Bleaney-Bowers [2] Equation (S1).

$$IT = \frac{C}{3 + \exp(-2J / k_B T)} \quad (\text{S1})$$

## Synthetic procedures

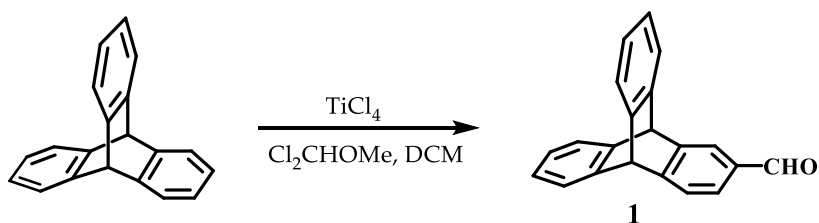

### 2-Formyltritycene (1)

To a solution of triptycene [3] (1.27 g, 5 mmol) in dry  $\text{CH}_2\text{Cl}_2$  (40 mL) was added  $\text{TiCl}_4$  (2.73 mL, 25 mmol), and the mixture was cooled to 0 °C under an argon atmosphere under stirring 20 min. Then,  $\text{Cl}_2\text{CHOMe}$  (1.81 mL, 25 mmol) in 30 mL of dry  $\text{CH}_2\text{Cl}_2$  were added dropwise over 30 min at 0 °C. The dark green mixture was stirred for 1 h at 0 °C. The reaction was monitored by TLC. After completion, quenched with ice water (200 g), and stirred for an additional hour. The organic layer was separated and the aqueous layer was extracted three times with 20 mL of  $\text{CH}_2\text{Cl}_2$ . The combined organic fractions were washed consecutively with saturated sodium bicarbonate (50 mL), water (50 mL), brine (50 mL), dried over anhydrous sodium sulphate, and the solvent was evaporated. The residue was purified by chromatography (petroleum ether/ $\text{CH}_2\text{Cl}_2$  = 1:1,  $R_f$  = 0.3) to give the product (0.987 g, yield: 70%) as a pale-yellow solid,  $^1\text{H}$  NMR (600 MHz, Chloroform- $d$ )  $\delta$  9.90 (s, 1H), 7.89 (s, 1H), 7.54 (s, 2H), 7.42 (dt,  $J$  = 6.7, 2.7 Hz, 4H), 7.05 – 7.01 (m, 4H), 5.52 (d,  $J$  = 9.5 Hz, 2H).  $^{13}\text{C}$  NMR (151 MHz, Chloroform- $d$ )  $\delta$  191.78, 152.11, 146.36, 144.45, 143.85, 129.17, 125.65, 125.57, 125.55, 124.12, 123.94, 123.92, 123.87, 123.85, 123.29, 77.24, 77.22, 77.03, 77.01, 76.98, 76.81, 76.80.

### 2,6-Diformyltritycene and 2,7-Diformyltritycene (2 and 3)

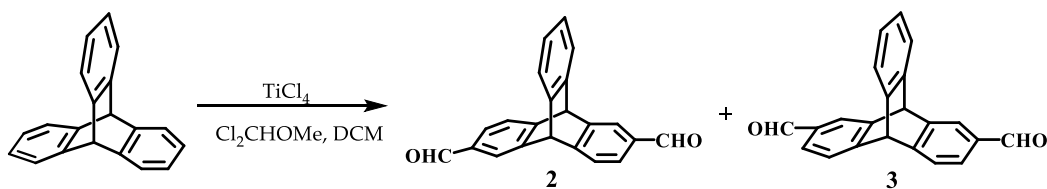

To a solution of triptycene [3] (1.27g, 5 mmol) in dry  $\text{CH}_2\text{Cl}_2$  (40 mL) was added  $\text{TiCl}_4$  (8.2 mL, 50 mmol), and the mixture was cooled to 0 °C under an argon atmosphere. under stirring 20 min. Then,  $\text{Cl}_2\text{CHOMe}$  (4.53 mL, 50 mmol) in 30 mL of dry  $\text{CH}_2\text{Cl}_2$  were added dropwise over 30 min at 0 °C. The dark green mixture was stirred for 1 h at 0 °C. The temperature was allowed to reach RT and the mixture was stirred for an additional 5 hours. The reaction was

monitored by TLC. After completion, quenched with ice water (200 g), and stirred for an additional hour. The organic layer was separated and the aqueous layer was extracted three times with 20 mL of CH<sub>2</sub>Cl<sub>2</sub>. The combined organic fractions were washed consecutively with saturated sodium bicarbonate (50 mL), water (50 mL), brine (50 mL), dried over anhydrous sodium sulphate, and the solvent was evaporated. The residue was purified by chromatography (petroleum ether/CH<sub>2</sub>Cl<sub>2</sub> = 1:50) to give 2,6-diformyltritycene (605 mg, yield: 39%) as a pale yellow solid and 2,7-diformyltritycene (540 mg, 35% yield) as a yellow solid.

2,6-Diformyltritycene (**2**). *R*<sub>f</sub> = 0.5 (petroleum ether/CH<sub>2</sub>Cl<sub>2</sub> = 1:50); <sup>1</sup>H NMR (600 MHz, Chloroform-d) δ 9.91 (d, *J* = 0.8 Hz, 2H), 7.92 (s, 2H), 7.58 (d, *J* = 1.2 Hz, 4H), 7.45 (dd, *J* = 5.4, 3.2 Hz, 2H), 7.10 - 7.04 (m, 2H), 5.62 (s, 2H). <sup>13</sup>C NMR (151 MHz, Chloroform-d) δ 191.60, 151.16, 145.05, 143.12, 134.28, 129.62, 126.08, 124.39, 124.18, 123.53, 77.23, 77.02, 76.80.

2,7-Diformyltritycene (**3**). *R*<sub>f</sub> = 0.45 (petroleum ether/CH<sub>2</sub>Cl<sub>2</sub> = 1:50); <sup>1</sup>H NMR (600 MHz, Chloroform-d) δ 9.91 (s, 2H), 7.92 (s, 2H), 7.58 (d, *J* = 1.8 Hz, 4H), 7.45 (ddd, *J* = 7.0, 4.9, 2.4 Hz, 2H), 7.09 - 7.03 (m, 2H), 5.63 (s, 1H), 5.60 (s, 1H). <sup>13</sup>C NMR (151 MHz, Chloroform-d) δ 191.58, 150.61, 145.61, 143.72, 142.57, 134.33, 129.28, 126.16, 125.99, 124.47, 124.24, 124.11, 123.65, 77.24, 77.02, 76.81.

## 2-TP-NN

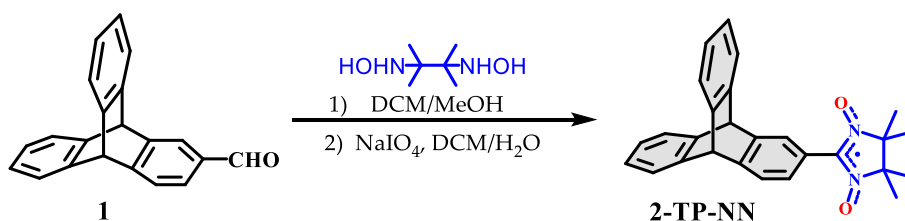

2-formyltritycene (141 mg, 0.5 mmol) and 2,3- Dimethyl-2,3-bis(hydroxylamino)butane (92 mg, 0.63 mmol) were charged into a flask, evacuated and kept under argon [4]. Mixed solvent with DCM (25 mL) and methanol (5 mL) were added into the flask from syringes and was kept argon bubbling for 15 min. Then the system was heated to 65 °C and refluxed for 48 hours. The color of the reaction mixture turned pale yellow. Then the solvent was evaporated and the white with a solid does not need further purification for synthesis of next step. The Compound was dissolved in 20 mL DCM and charged into a flask. Then the solution was slowly added with 1.1 equiv NaIO<sub>4</sub> solved in mixture of 10 mL distilled water and 10 mL DCM. The reaction was kept in ice bath for about 30 min. When the color of mixture turned from pale

yellow to dark blue, the proceeding of reaction could be stopped and a flesh column was used to purification. A blue sticky solid was separated and collected. DCM as eluent to obtain purple solid powder product (40 mg) in 21% yield two steps.

#### 2,6-TP-NN

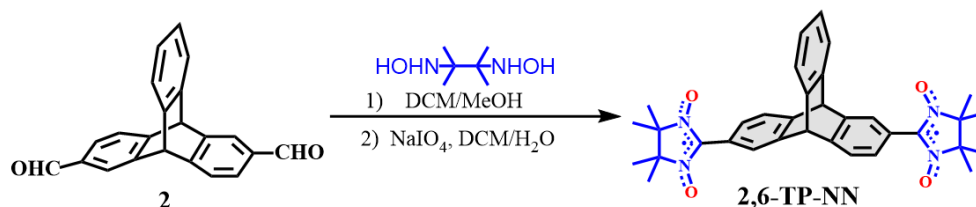

2,6-Diformyltritycene (155 mg, 0.5 mmol) and 2,3-Dimethyl-2,3-bis(hydroxylamino)butane [4] (92 mg, 0.63 mmol) were charged into a flask, evacuated and kept under argon. Mixed solvent with DCM (25 mL) and methanol (5 mL) were added into the flask from syringes and was kept argon bubbling for 15 min. Then the system was heated to 65 °C and refluxed for 48 hours. The color of the reaction mixture turned pale yellow. Then the solvent was evaporated and the white with a solid does not need further purification for synthesis of next step. The Compound was dissolved in 20 mL DCM and charged into a flask. Then the solution was slowly added with 1.1 equiv NaIO<sub>4</sub> solved in mixture of 10 mL distilled water and 10 mL DCM. The reaction was kept in ice bath for about 30 min. When the color of mixture turned from pale yellow to dark blue, the proceeding of reaction could be stopped and a flesh column was used to purification. A blue sticky solid was separated and collected. DCM as eluent to obtain blue solid powder product (52 mg) in 18% yield two steps.

#### 2,7-TP-NN

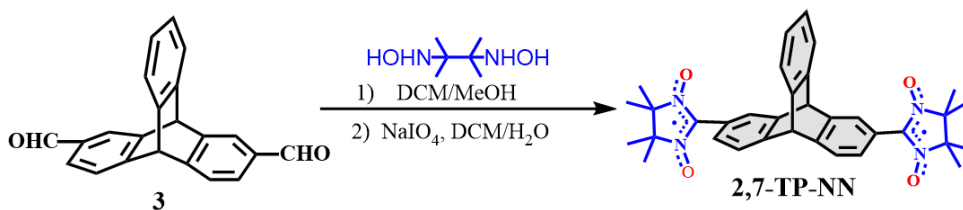

Similar synthetic procedures for 2,7-TP-NN were applied to the substrate of 3 (155 mg) to obtain 2,7-TP-NN (45.9 mg) as a blue solid (16%, two steps).

## Optical Properties

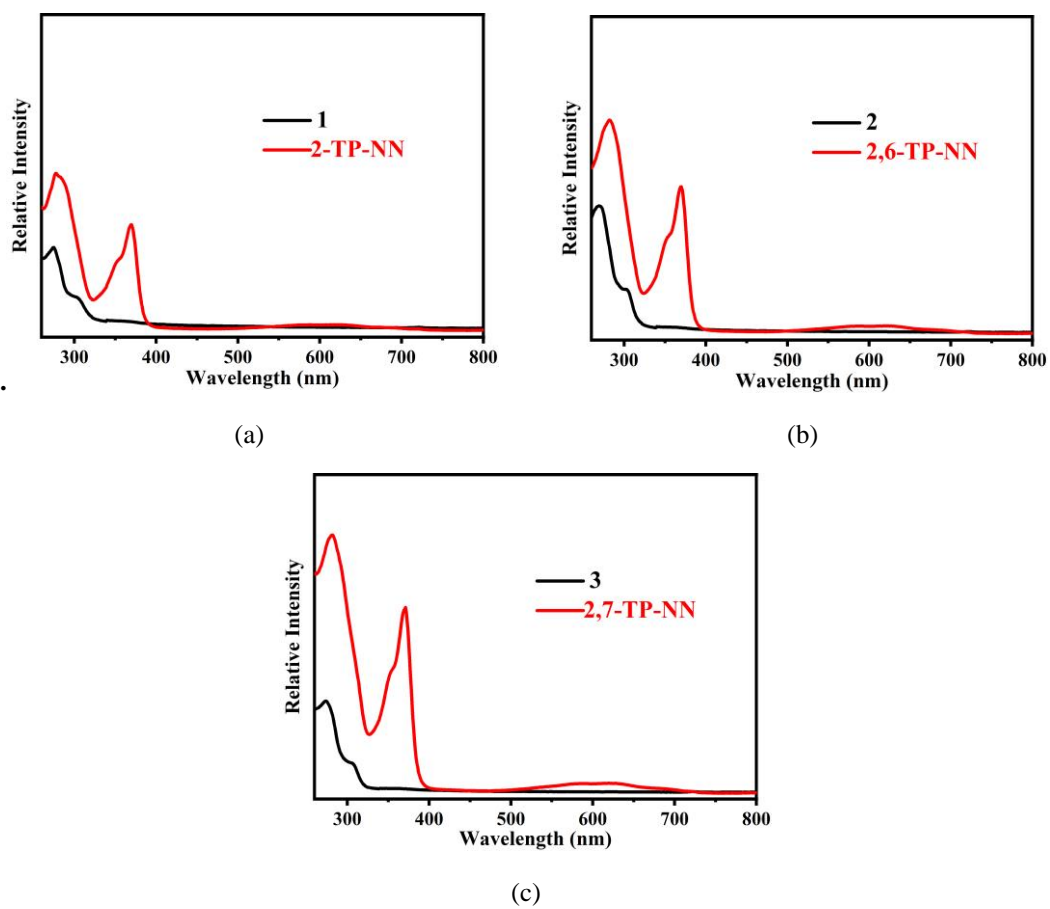

**Figure S1.** Normalized UV-vis absorption spectra of (a) 2-TP-NN, (b) 2,6-TP-NN, and (c) 2,7-TP-NN in toluene.

## EPR spectra

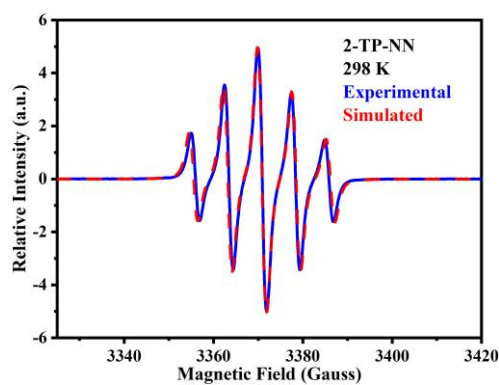

(a)

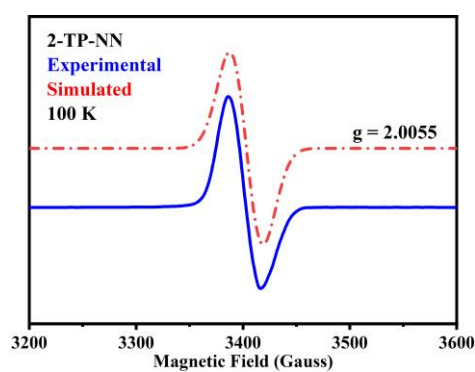

(b)

**Figure S2.** EPR spectra in degassed toluene ( $10^{-4}$  M) solution for 2-TP-NN at room temperature (blue) and simulated (red) (a). Experimental EPR spectra recorded in toluene solution for 2-TP-NN at 100 K (blue) and simulated (red) (b).

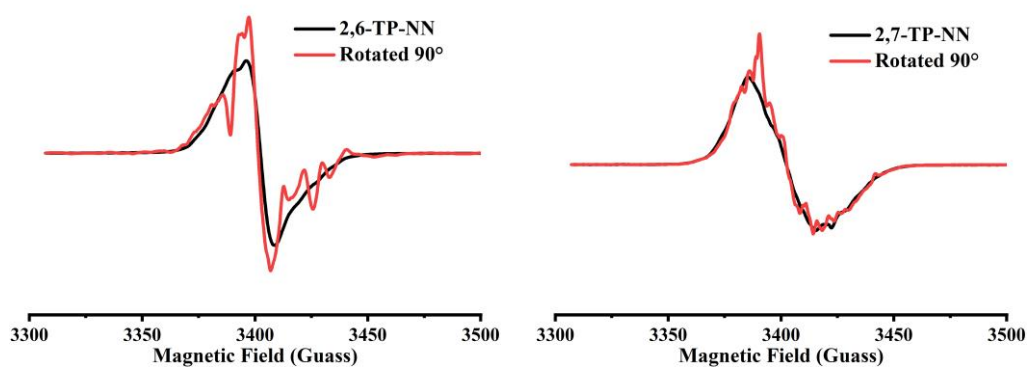

(a)

(b)

**Figure S3.** EPR frozen state ZFS spectra for testing, and then rotated  $90^\circ$  for testing of diradicals 2,6-TP-NN (a) and 2,7-TP-NN (b) at 100 K.

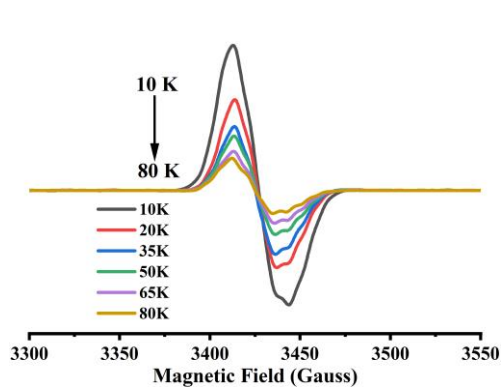

(a)

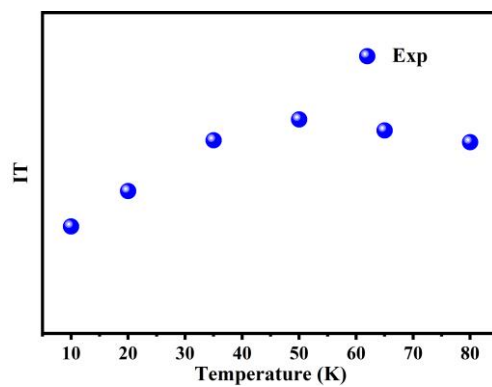

(b)

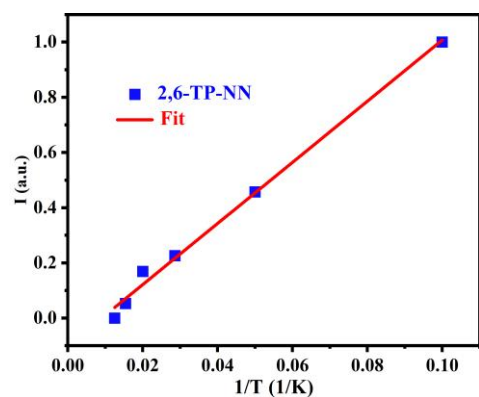

(c)

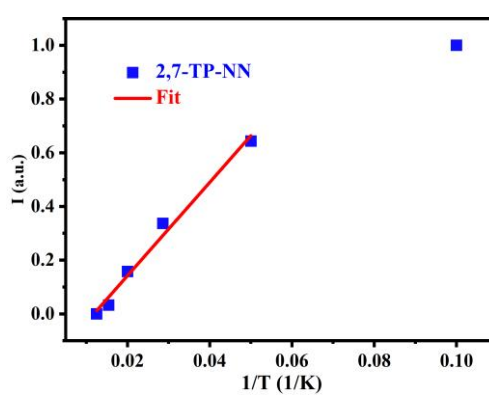

(d)

**Figure S4.** VT-EPR spectra of (a) 2,6-TP-NN and (b) IT-T plot of 2,6-TP-NN. The observed normalized I-T curve presented as a straight line for (c) 2,6-TP-NN and (d) 2,7-TP-NN.

## Magnetic Properties

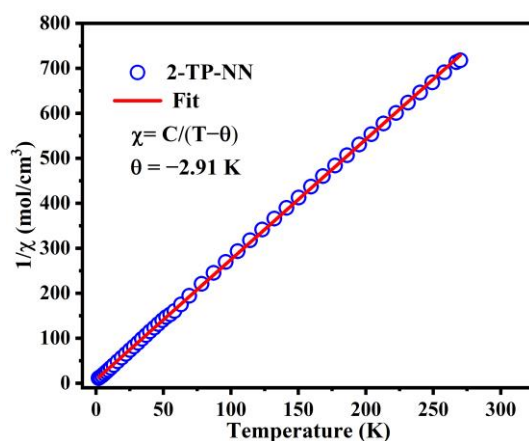

(a)

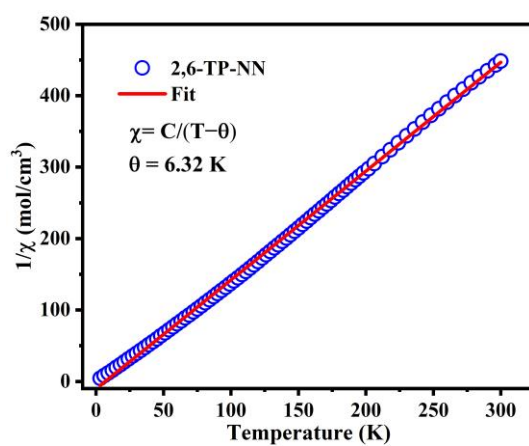

(b)

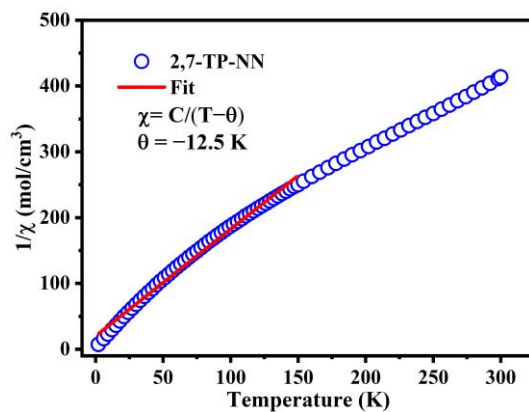

(c)

Figure S5. Curie-Weiss model straight line of (a) 2-TP-NN, (b) 2,6-TP-NN and (c) 2,7-TP-NN.

Table S1. Magnetic Properties of 2-TP-NN.

| Radicals | $T_{\max}$ (K) | $\theta$ (K) | $J_{\exp}$ (cm <sup>-1</sup> ) |
|----------|----------------|--------------|--------------------------------|
| 2-TP-NN  | -              | -0.86        | -0.75                          |

## X-ray Crystallography

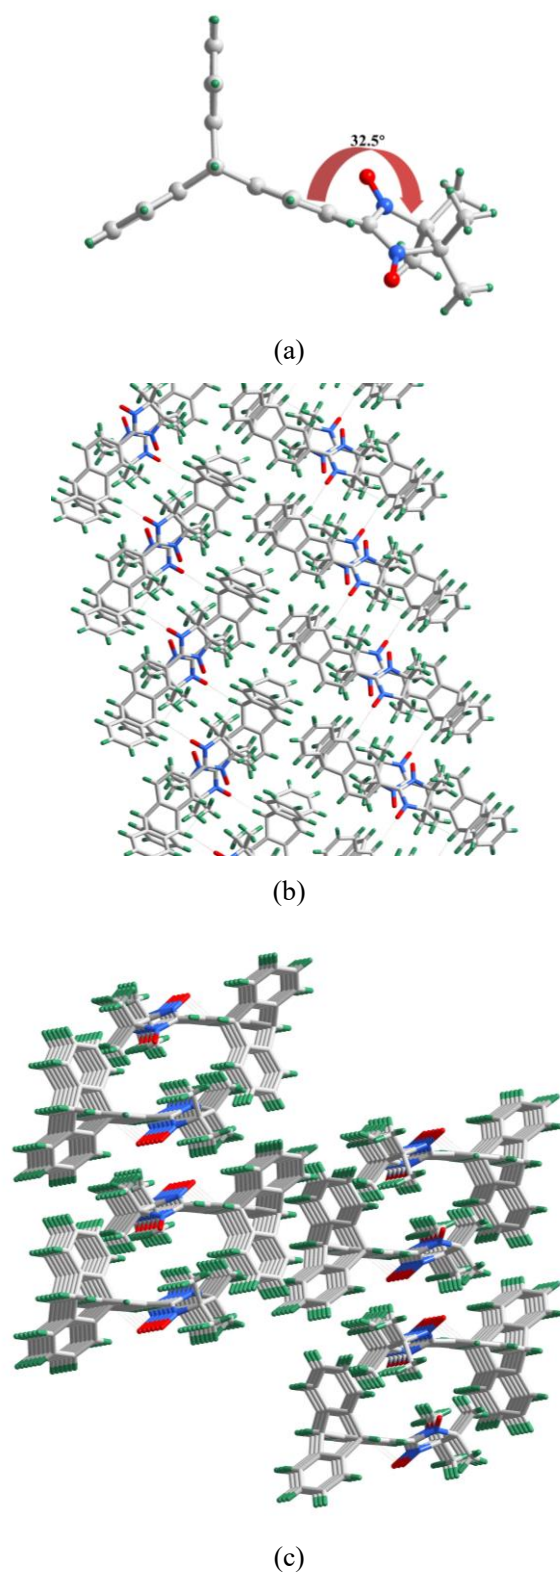

**Figure S6.** Single-crystal structures of 2-TP-NN. (a) The benzene ring connected with NN unit with torsions of  $32.5^\circ$ , (b) The crystal packing of 2-TP-NN along axis b and (c) axis a.

**Table S2.** Crystal data and structure refinement for 2-TP-NN.

|                                             |                                                                |
|---------------------------------------------|----------------------------------------------------------------|
| Identification code                         | 2-TP-NN                                                        |
| Empirical formula                           | C <sub>27</sub> H <sub>25</sub> N <sub>2</sub> O <sub>2</sub>  |
| Formula weight                              | 409.49                                                         |
| Temperature/K                               | 291                                                            |
| Crystal system                              | monoclinic                                                     |
| Space group                                 | P2 <sub>1</sub> /n                                             |
| a/Å                                         | 9.9820(4)                                                      |
| b/Å                                         | 8.1768(3)                                                      |
| c/Å                                         | 26.9862(9)                                                     |
| $\alpha$ /°                                 | 90                                                             |
| $\beta$ /°                                  | 99.809(4)                                                      |
| $\gamma$ /°                                 | 90                                                             |
| Volume/Å <sup>3</sup>                       | 2170.43(14)                                                    |
| Z                                           | 4                                                              |
| $\rho_{\text{calc}}/\text{cm}^3$            | 1.253                                                          |
| $\mu/\text{mm}^{-1}$                        | 0.626                                                          |
| F(000)                                      | 868.0                                                          |
| Crystal size/mm <sup>3</sup>                | 0.25 × 0.23 × 0.22                                             |
| Radiation                                   | Cu K $\alpha$ ( $\lambda$ = 1.54184)                           |
| 2 $\theta$ range for data collection/°      | 9.04 to 139.826                                                |
| Index ranges                                | −12 ≤ h ≤ 11, −9 ≤ k ≤ 9, −28 ≤ l ≤ 32                         |
| Reflections collected                       | 16734                                                          |
| Independent reflections                     | 4062 [ $R_{\text{int}}$ = 0.0385, $R_{\text{sigma}}$ = 0.0261] |
| Data/restraints/parameters                  | 4062/0/284                                                     |
| Goodness-of-fit on F <sup>2</sup>           | 1.030                                                          |
| Final R indexes [ $I \geq 2\sigma(I)$ ]     | $R_1$ = 0.0568, $wR_2$ = 0.1563                                |
| Final R indexes [all data]                  | $R_1$ = 0.0738, $wR_2$ = 0.1708                                |
| Largest diff. peak/hole / e Å <sup>−3</sup> | 0.19/−0.32                                                     |

**Table S3.** Bond Lengths for 2-TP-NN.

| Atom | Atom | Length/Å | Atom | Atom | Length/Å |
|------|------|----------|------|------|----------|
| N1   | O1   | 1.279(3) | C1   | C21  | 1.465(3) |
| N1   | C21  | 1.339(3) | C1   | C6   | 1.384(3) |
| N1   | C22  | 1.511(3) | C15  | C14  | 1.516(3) |
| O2   | N2   | 1.283(3) | C15  | C16  | 1.379(3) |
| N2   | C21  | 1.342(3) | C13  | C14  | 1.519(3) |
| N2   | C23  | 1.496(3) | C13  | C12  | 1.384(3) |
| C3   | C7   | 1.533(3) | C9   | C10  | 1.389(3) |
| C3   | C4   | 1.394(3) | C5   | C6   | 1.377(3) |
| C3   | C2   | 1.377(3) | C12  | C11  | 1.386(4) |
| C7   | C20  | 1.518(3) | C19  | C18  | 1.386(4) |
| C7   | C8   | 1.520(3) | C16  | C17  | 1.383(4) |
| C20  | C15  | 1.404(3) | C11  | C10  | 1.378(4) |

| Atom | Atom | Length/Å | Atom | Atom | Length/Å |
|------|------|----------|------|------|----------|
| C20  | C19  | 1.380(3) | C22  | C23  | 1.541(4) |
| C8   | C13  | 1.401(3) | C22  | C27  | 1.509(4) |
| C8   | C9   | 1.381(3) | C22  | C26  | 1.526(4) |
| C4   | C14  | 1.520(3) | C23  | C25  | 1.535(4) |
| C4   | C5   | 1.381(3) | C23  | C24  | 1.523(4) |
| C1   | C2   | 1.403(3) | C17  | C18  | 1.370(4) |

**Table S4.** Bond Angles for 2-TP-NN.

| Atom | Atom | Atom | Angle/°    | Atom | Atom | Atom | Angle/°    |
|------|------|------|------------|------|------|------|------------|
| O1   | N1   | C21  | 126.84(19) | C3   | C2   | C1   | 119.07(19) |
| O1   | N1   | C22  | 121.61(18) | C15  | C14  | C4   | 104.19(17) |
| C21  | N1   | C22  | 111.32(18) | C15  | C14  | C13  | 106.09(17) |
| O2   | N2   | C21  | 127.12(19) | C13  | C14  | C4   | 107.00(17) |
| O2   | N2   | C23  | 121.19(19) | C8   | C9   | C10  | 119.0(2)   |
| C21  | N2   | C23  | 111.37(18) | C6   | C5   | C4   | 119.42(19) |
| C4   | C3   | C7   | 112.77(17) | N1   | C21  | N2   | 108.76(18) |
| C2   | C3   | C7   | 126.45(18) | N1   | C21  | C1   | 125.97(19) |
| C2   | C3   | C4   | 120.62(18) | N2   | C21  | C1   | 125.08(19) |
| C20  | C7   | C3   | 104.15(17) | C5   | C6   | C1   | 121.0(2)   |
| C20  | C7   | C8   | 105.96(16) | C13  | C12  | C11  | 119.2(2)   |
| C8   | C7   | C3   | 106.88(16) | C20  | C19  | C18  | 119.1(2)   |
| C15  | C20  | C7   | 112.88(18) | C15  | C16  | C17  | 119.0(3)   |
| C19  | C20  | C7   | 127.2(2)   | C10  | C11  | C12  | 120.6(2)   |
| C19  | C20  | C15  | 119.9(2)   | C11  | C10  | C9   | 120.6(2)   |
| C13  | C8   | C7   | 112.96(18) | N1   | C22  | C23  | 100.09(17) |
| C9   | C8   | C7   | 126.57(19) | N1   | C22  | C26  | 105.6(2)   |
| C9   | C8   | C13  | 120.40(19) | C27  | C22  | N1   | 109.9(2)   |
| C3   | C4   | C14  | 113.28(17) | C27  | C22  | C23  | 115.8(2)   |
| C5   | C4   | C3   | 120.16(18) | C27  | C22  | C26  | 110.5(2)   |
| C5   | C4   | C14  | 126.35(18) | C26  | C22  | C23  | 114.0(2)   |
| C2   | C1   | C21  | 121.47(19) | N2   | C23  | C22  | 100.25(18) |
| C6   | C1   | C2   | 119.74(19) | N2   | C23  | C25  | 105.0(2)   |
| C6   | C1   | C21  | 118.65(19) | N2   | C23  | C24  | 110.7(2)   |
| C20  | C15  | C14  | 113.08(19) | C25  | C23  | C22  | 113.7(2)   |
| C16  | C15  | C20  | 120.4(2)   | C24  | C23  | C22  | 115.9(2)   |
| C16  | C15  | C14  | 126.5(2)   | C24  | C23  | C25  | 110.4(2)   |
| C8   | C13  | C14  | 113.04(18) | C18  | C17  | C16  | 120.8(3)   |
| C12  | C13  | C8   | 120.1(2)   | C17  | C18  | C19  | 120.8(3)   |
| C12  | C13  | C14  | 126.9(2)   |      |      |      |            |

## Computational Studies

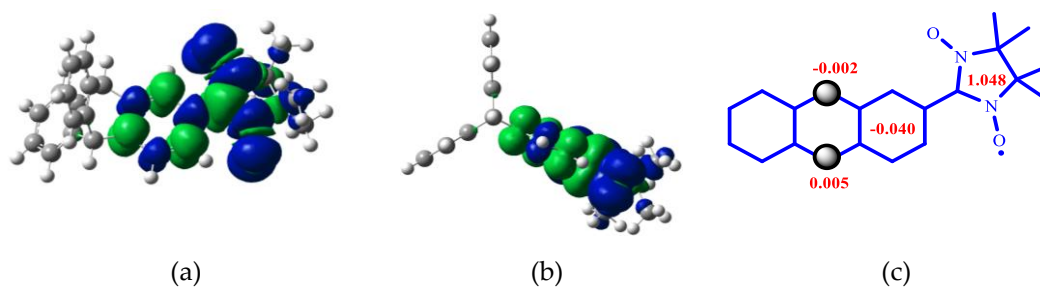

**Figure S7.** Spin density distributions and spin population of 2-TP-NN were calculated using UB3LYP/6-31G method (blue and green surfaces correspond to  $\alpha$  and  $\beta$  spin densities, respectively, with an isovalue of 0.004.).

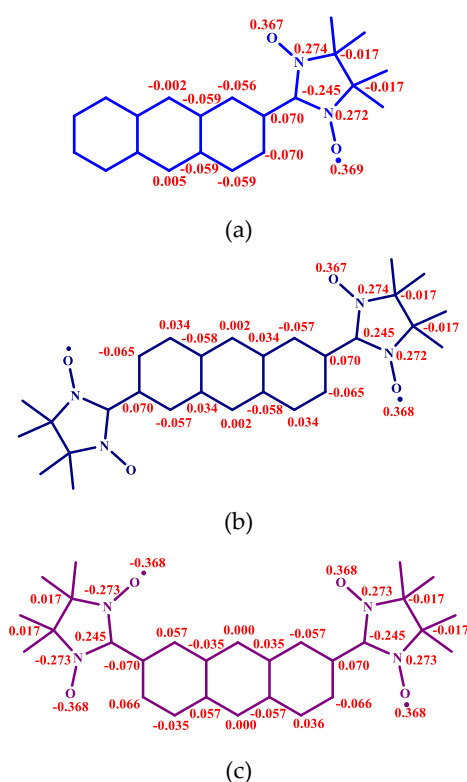

**Figure S8.** Atomic spin populations calculated using Mulliken protocol at the UB3LYP/6-31G level. (a) 2-TP-NN, (b) 2,6-TP-NN and (c) 2,7-TP-NN.

**Table S5.** Summary of diradical calculation results [5].

| Radicals  | $E_{BS}-E_T$ (eV) | $\langle S^2 \rangle_{BS}$ | $\langle S^2 \rangle_T$ | $J_{calc}$ (cm <sup>-1</sup> ) |
|-----------|-------------------|----------------------------|-------------------------|--------------------------------|
| 2,6-TP-NN | 0.00013           | 1.141213                   | 2.141606                | 1.06                           |
| 2,7-TP-NN | -0.00043          | 1.142336                   | 2.141535                | -3.50                          |

**Table S6.** HOMO, LUMO and HOMO–LUMO( $\Delta E_{HL}$ ) energy.

| Radicals  | HOMO (eV) | LUMO (eV) | $\Delta E_{HL}$ (eV) |
|-----------|-----------|-----------|----------------------|
| 2-TP-NN   | −5.29     | −1.36     | 3.93                 |
| 2,6-TP-NN | −5.27     | −1.36     | 3.91                 |
| 2,7-TP-NN | −5.27     | −2.24     | 3.03                 |

The spatial distribution of molecular orbitals (red and blue color represent the different phase of the orbital coefficients), the isovalue is 0.004.

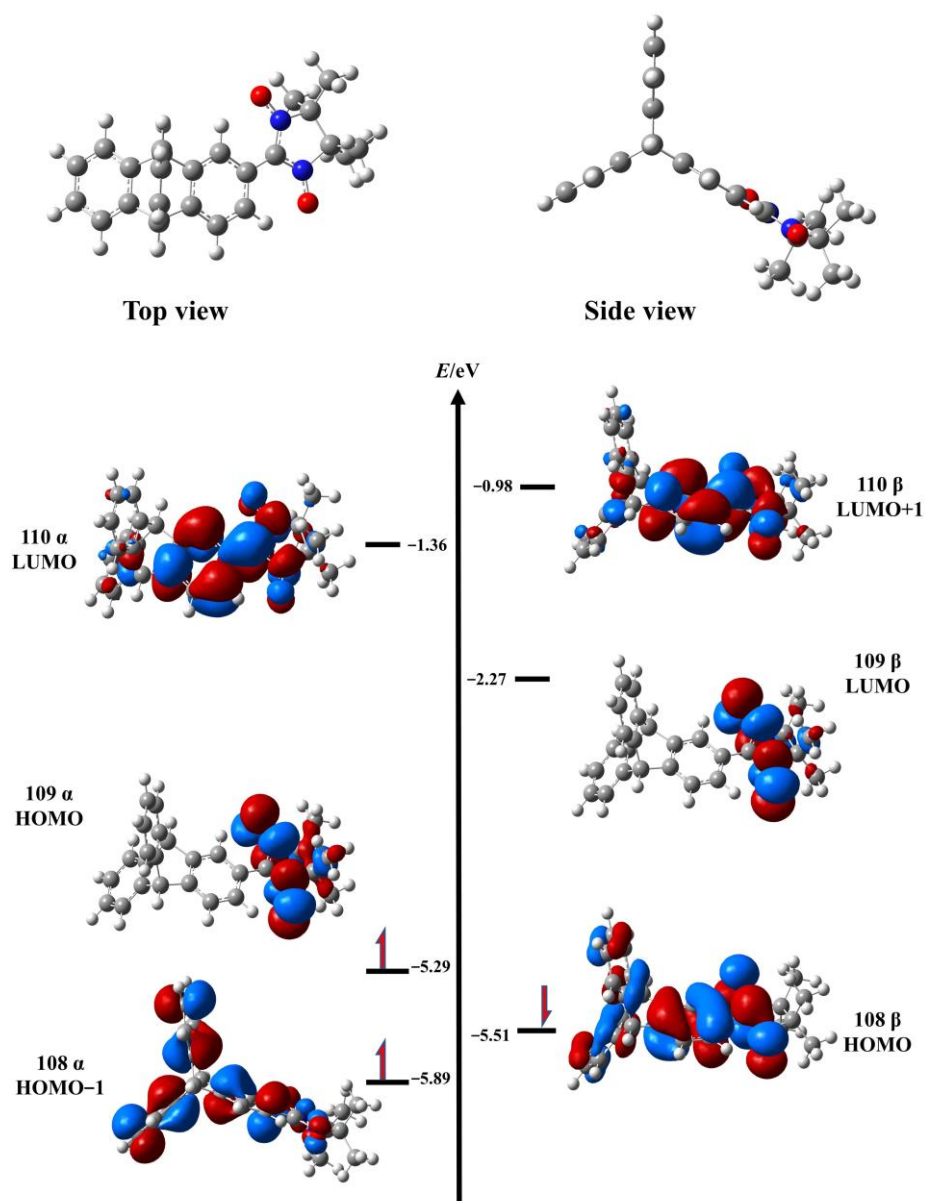

**Figure S9.** The 2-TP-NN spatial distribution of molecular orbitals.

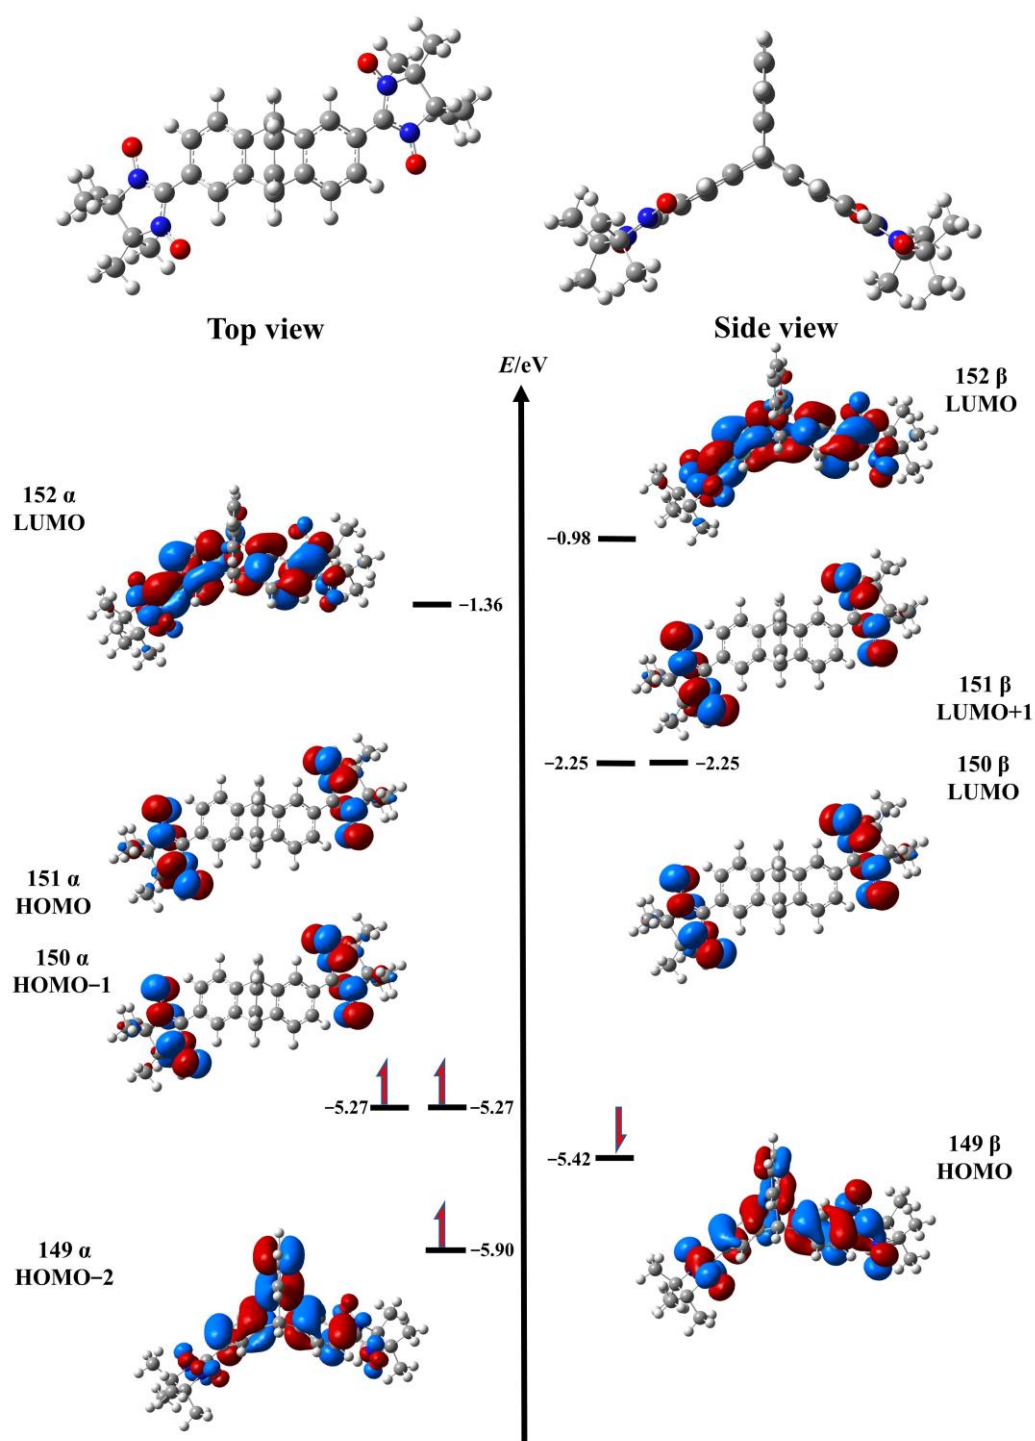

**Figure S10.** The 2,6-TP-NN spatial distribution of molecular orbitals.

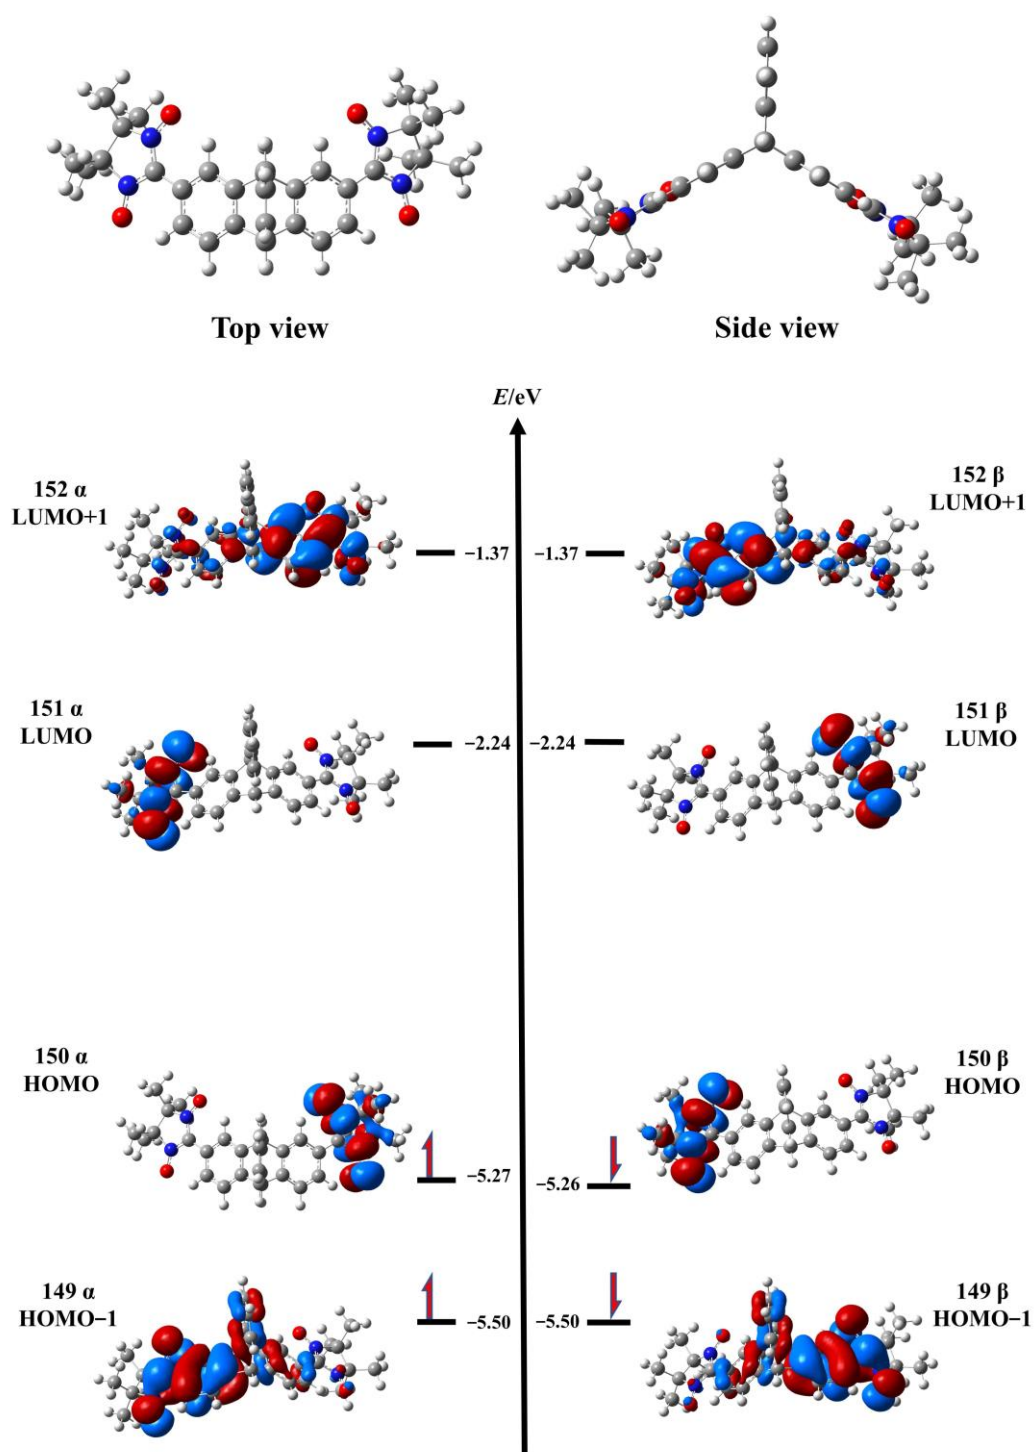

Figure S11. The 2,7-TP-NN spatial distribution of molecular orbitals.

## References

1. Stoll, S.; Schweiger, A. EasySpin, a comprehensive software package for spectral simulation and analysis in EPR. *J. Magn. Reson.* **2006**, *178*, 42–55. <https://doi.org/10.1016/j.jmr.2005.08.013>.
2. Hase, S.; Shiomi, D.; Sato, K.; Takui, T. Phenol-substituted nitronyl nitroxide biradicals with a triplet ( $S=1$ ) ground state. *J. Mater. Chem. C* **2001**, *11*, 756–760. <https://doi.org/10.1039/b007316o>.
3. Li, P.F.; Chen, C.F. Synthesis, structures, and solid state self-assemblies of formyl and acetyl substituted triptycenes and their derivatives. *J. Org. Chem.* **2012**, *77*, 9250–9259. <https://doi.org/10.1021/jo301820v>.
4. Wang, D.; Ma, Y.; Wolf, B.; Kokorin, A.I.; Baumgarten, M. Temperature-Dependent Intramolecular Spin Coupling Interactions of a Flexible Bridged Nitronyl Nitroxide Biradical in Solution. *J. Phys. Chem. A* **2018**, *122*, 574–581. <https://doi.org/10.1021/acs.jpca.7b10559>.
5. Bleaney, B.; Bowers, K. Anomalous paramagnetism of copper acetate. *Proc. R. Soc. London, Ser. A* **1952**, *214*, 451–465.

# Copies of $^1\text{H}$ , $^{13}\text{C}$ NMR Spectra Mass Spectra

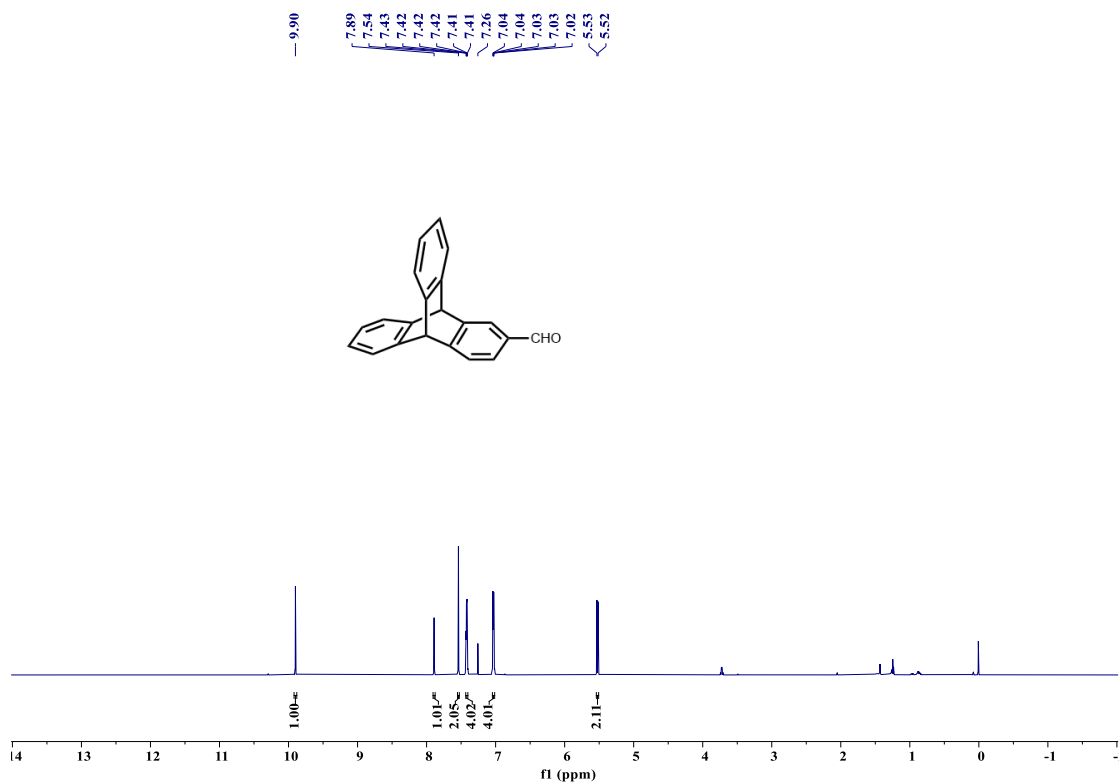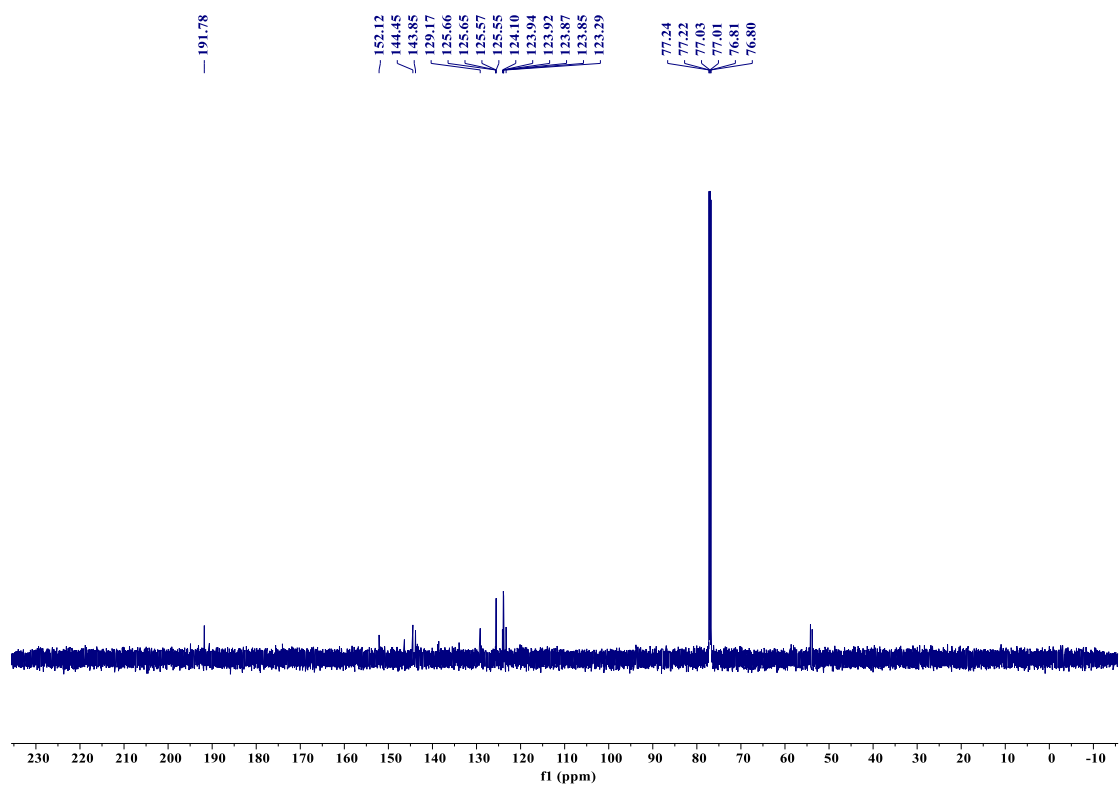

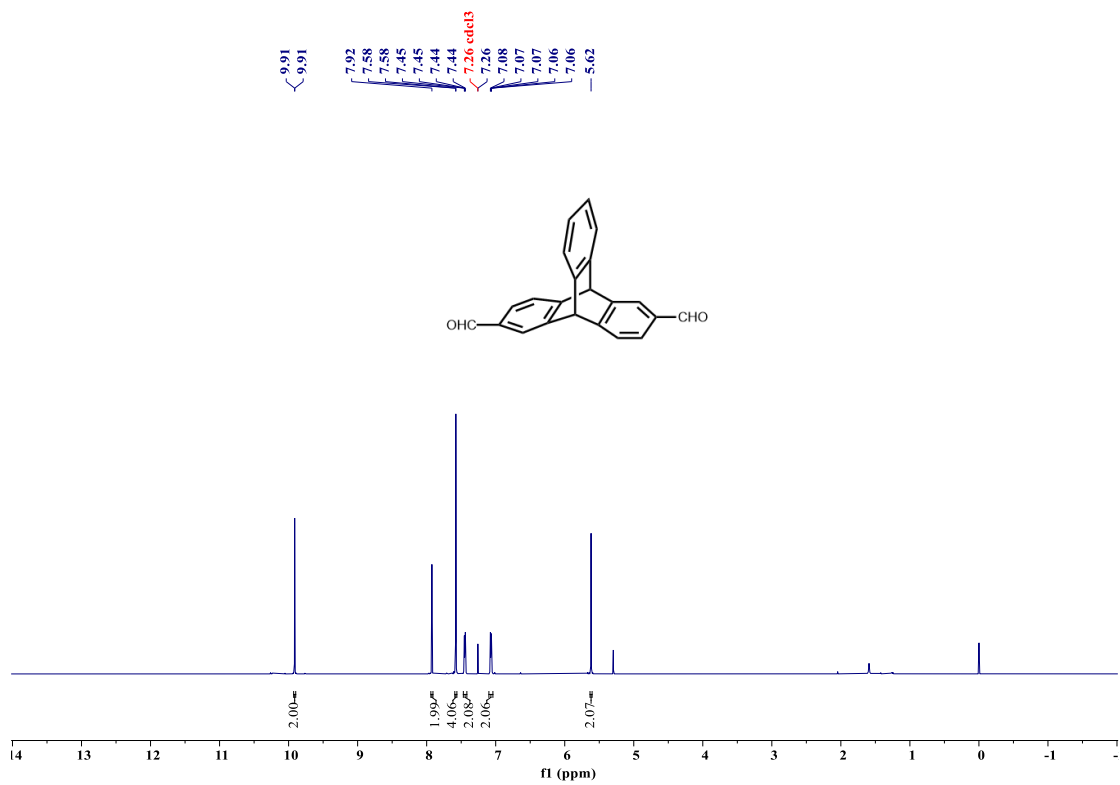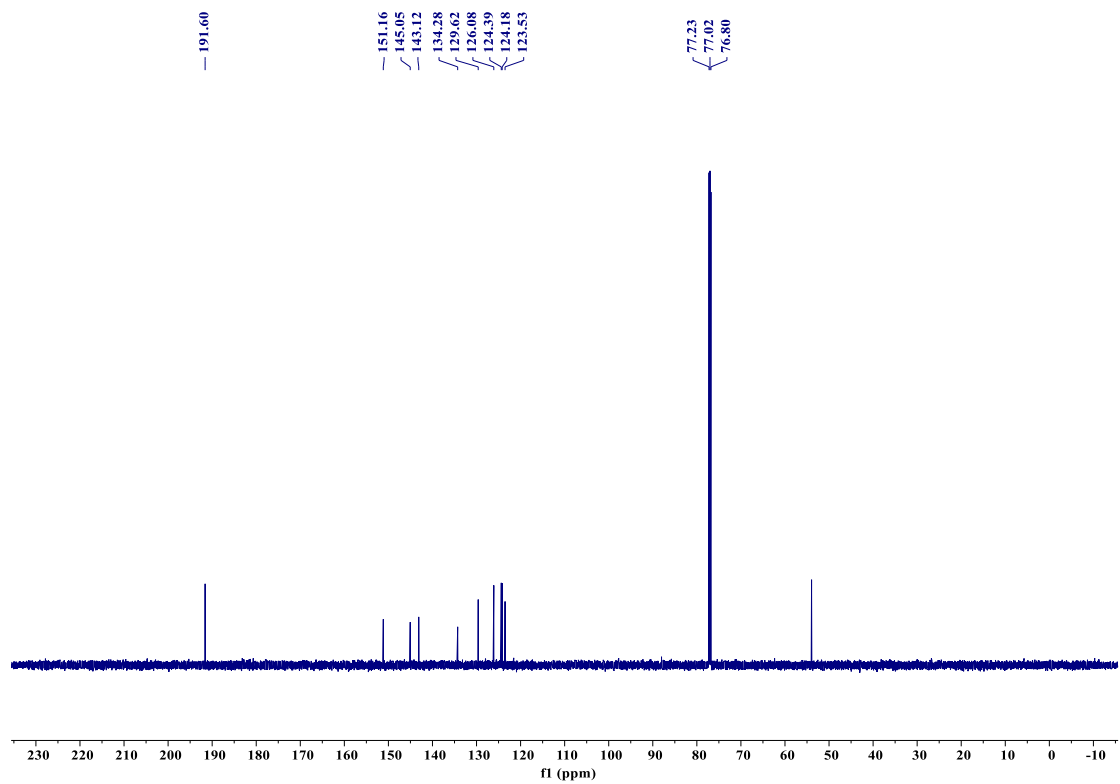

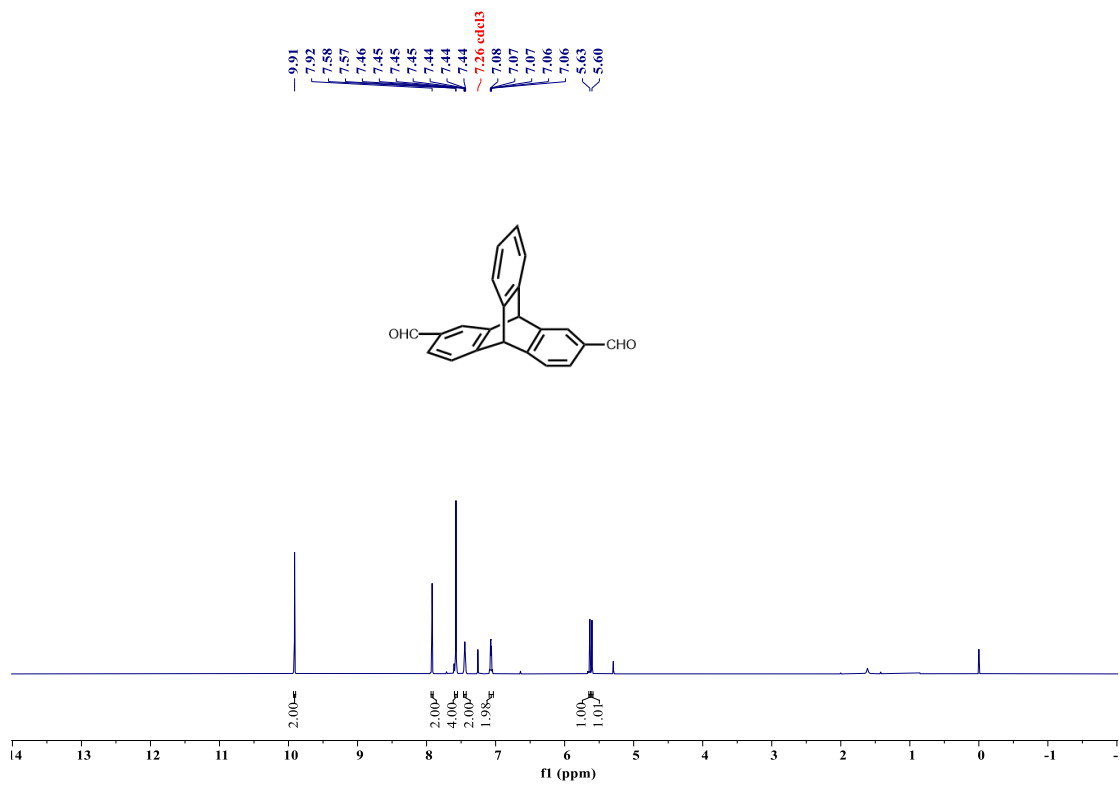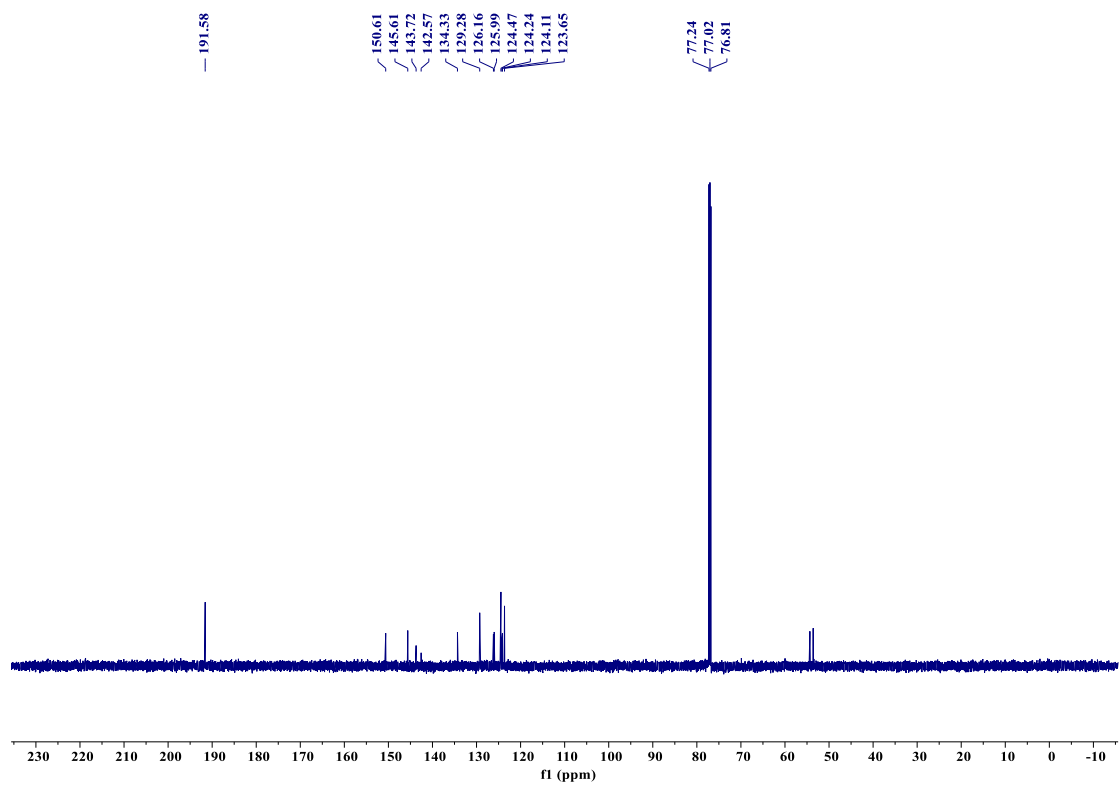

## Geometry Coordinates

### 2-PT-NN (double)

Symbolic Z-matrix:

Charge = 0 Multiplicity = 2

|   |          |          |          |
|---|----------|----------|----------|
| C | 2.37     | -1.078   | 2.542    |
| C | 3.593    | -0.85    | 1.672    |
| C | 3.451    | -1.243   | 0.391    |
| C | 2.096    | -1.842   | 0.06     |
| C | 2.068    | -2.555   | 2.365    |
| C | 1.926    | -2.949   | 1.085    |
| C | 1.107    | -0.78    | 0.506    |
| C | 1.253    | -0.387   | 1.783    |
| C | 0.432    | 0.544    | 2.28     |
| C | -0.521   | 1.073    | 1.495    |
| C | -0.693   | 0.706    | 0.205    |
| C | 0.149    | -0.242   | -0.263   |
| C | 4.461    | -1.094   | -0.478   |
| C | 5.615    | -0.548   | -0.059   |
| C | 5.756    | -0.156   | 1.218    |
| C | 4.746    | -0.305   | 2.089    |
| C | 1.94     | -3.441   | 3.364    |
| C | 1.67     | -4.724   | 3.075    |
| C | 1.528    | -5.117   | 1.798    |
| C | 1.656    | -4.231   | 0.797    |
| C | -1.66    | 1.244    | -0.581   |
| N | -1.87    | 0.832    | -1.77    |
| C | -2.783   | 1.782    | -2.479   |
| C | -3.456   | 2.424    | -1.236   |
| N | -2.415   | 2.199    | -0.187   |
| O | -2.2466  | 2.82963  | 0.9555   |
| O | -1.39304 | -0.25204 | -2.35595 |
| C | -3.765   | 1.159    | -3.487   |
| C | -1.87    | 2.758    | -3.256   |
| C | -3.854   | 3.898    | -1.445   |
| C | -4.718   | 1.675    | -0.75    |
| H | 2.484    | -0.751   | 3.596    |
| H | 1.983    | -2.169   | -0.994   |
| H | 0.535    | 0.863    | 3.33     |
| H | -1.177   | 1.812    | 1.983    |
| H | 0.105    | -0.608   | -1.301   |
| H | 4.344    | -1.416   | -1.525   |
| H | 6.45     | -0.422   | -0.768   |
| H | 6.707    | 0.291    | 1.553    |
| H | 4.86     | 0.017    | 3.137    |

|   |        |        |        |
|---|--------|--------|--------|
| H | 2.056  | -3.117 | 4.411  |
| H | 1.563  | -5.459 | 3.891  |
| H | 1.306  | -6.173 | 1.57   |
| H | 1.54   | -4.552 | -0.25  |
| H | -3.216 | 0.679  | -4.329 |
| H | -4.414 | 0.373  | -3.044 |
| H | -4.433 | 1.937  | -3.919 |
| H | -2.456 | 3.526  | -3.808 |
| H | -1.151 | 3.283  | -2.588 |
| H | -1.263 | 2.209  | -4.012 |
| H | -4.337 | 4.317  | -0.533 |
| H | -2.987 | 4.556  | -1.669 |
| H | -4.58  | 3.997  | -2.283 |
| H | -5.566 | 1.789  | -1.462 |
| H | -4.537 | 0.588  | -0.6   |
| H | -5.061 | 2.078  | 0.23   |

**2,6-TP-NN** (singlet)

Symbolic Z-matrix:

Charge = 0 Multiplicity = 1

|   |        |        |        |
|---|--------|--------|--------|
| C | -2.817 | 1.367  | -1.081 |
| C | -3.151 | 0.074  | -0.905 |
| C | -2.233 | -0.905 | -0.965 |
| C | -0.953 | -0.594 | -1.205 |
| C | -0.6   | 0.692  | -1.385 |
| C | -1.525 | 1.66   | -1.324 |
| C | 0.878  | 0.908  | -1.655 |
| C | 0.19   | -1.587 | -1.306 |
| C | 1.566  | 0.217  | -0.493 |
| C | 1.212  | -1.068 | -0.311 |
| C | 1.756  | -1.783 | 0.683  |
| C | 2.664  | -1.234 | 1.514  |
| C | 3.007  | 0.053  | 1.315  |
| C | 2.468  | 0.78   | 0.323  |
| C | 1.168  | 0.001  | -2.837 |
| C | 0.813  | -1.286 | -2.657 |
| C | 1.019  | -2.187 | -3.629 |
| C | 1.581  | -1.793 | -4.783 |
| C | 1.934  | -0.51  | -4.963 |
| C | 1.729  | 0.393  | -3.99  |
| C | 3.257  | -2.098 | 2.621  |
| C | -3.831 | 2.504  | -1.031 |
| N | 3.885  | -1.315 | 3.684  |
| C | 5.264  | -1.786 | 3.791  |
| C | 5.203  | -3.21  | 3.178  |

|   |        |        |        |
|---|--------|--------|--------|
| N | 4.224  | -3.062 | 2.107  |
| N | -5.049 | 2.152  | -0.305 |
| C | -6.167 | 2.408  | -1.212 |
| C | -5.577 | 3.415  | -2.235 |
| N | -4.192 | 2.976  | -2.364 |
| C | -6.578 | 1.057  | -1.85  |
| C | -7.433 | 2.927  | -0.492 |
| C | -5.566 | 4.869  | -1.699 |
| C | -6.312 | 3.456  | -3.591 |
| O | -3.963 | 2.13   | -3.351 |
| O | -5.119 | 2.721  | 0.885  |
| C | 6.16   | -0.811 | 2.986  |
| C | 5.807  | -1.75  | 5.237  |
| C | 4.66   | -4.265 | 4.174  |
| C | 6.558  | -3.747 | 2.671  |
| O | 4.732  | -2.788 | 0.919  |
| O | 3.202  | -1.306 | 4.814  |
| H | -4.195 | -0.22  | -0.712 |
| H | -2.527 | -1.957 | -0.821 |
| H | -1.214 | 2.705  | -1.482 |
| H | 1.172  | 1.968  | -1.802 |
| H | -0.105 | -2.646 | -1.157 |
| H | 1.456  | -2.836 | 0.81   |
| H | 3.749  | 0.549  | 1.961  |
| H | 2.764  | 1.831  | 0.175  |
| H | 0.729  | -3.239 | -3.48  |
| H | 1.754  | -2.528 | -5.587 |
| H | 2.396  | -0.195 | -5.914 |
| H | 2.019  | 1.446  | -4.136 |
| H | -7.462 | 1.164  | -2.517 |
| H | -5.767 | 0.583  | -2.442 |
| H | -6.86  | 0.319  | -1.064 |
| H | -7.825 | 2.174  | 0.229  |
| H | -7.259 | 3.858  | 0.089  |
| H | -8.246 | 3.145  | -1.22  |
| H | -6.589 | 5.304  | -1.659 |
| H | -5.125 | 4.958  | -0.682 |
| H | -4.966 | 5.53   | -2.364 |
| H | -5.83  | 4.183  | -4.284 |
| H | -6.319 | 2.477  | -4.118 |
| H | -7.373 | 3.766  | -3.463 |
| H | 7.237  | -1.08  | 3.058  |
| H | 5.899  | -0.756 | 1.909  |
| H | 6.066  | 0.227  | 3.38   |

|   |       |        |       |
|---|-------|--------|-------|
| H | 5.82  | -0.711 | 5.637 |
| H | 5.207 | -2.354 | 5.951 |
| H | 6.85  | -2.138 | 5.282 |
| H | 5.395 | -4.492 | 4.979 |
| H | 3.711 | -3.958 | 4.664 |
| H | 4.451 | -5.228 | 3.655 |
| H | 6.445 | -4.763 | 2.228 |
| H | 7.019 | -3.111 | 1.885 |
| H | 7.295 | -3.823 | 3.502 |

**2,6-TP-NN (triplet)**

Symbolic Z-matrix:

Charge = 0 Multiplicity = 3

|   |        |        |        |
|---|--------|--------|--------|
| C | -2.817 | 1.367  | -1.081 |
| C | -3.151 | 0.074  | -0.905 |
| C | -2.233 | -0.905 | -0.965 |
| C | -0.953 | -0.594 | -1.205 |
| C | -0.6   | 0.692  | -1.385 |
| C | -1.525 | 1.66   | -1.324 |
| C | 0.878  | 0.908  | -1.655 |
| C | 0.19   | -1.587 | -1.306 |
| C | 1.566  | 0.217  | -0.493 |
| C | 1.212  | -1.068 | -0.311 |
| C | 1.756  | -1.783 | 0.683  |
| C | 2.664  | -1.234 | 1.514  |
| C | 3.007  | 0.053  | 1.315  |
| C | 2.468  | 0.78   | 0.323  |
| C | 1.168  | 0.001  | -2.837 |
| C | 0.813  | -1.286 | -2.657 |
| C | 1.019  | -2.187 | -3.629 |
| C | 1.581  | -1.793 | -4.783 |
| C | 1.934  | -0.51  | -4.963 |
| C | 1.729  | 0.393  | -3.99  |
| C | 3.257  | -2.098 | 2.621  |
| C | -3.831 | 2.504  | -1.031 |
| N | 3.885  | -1.315 | 3.684  |
| C | 5.264  | -1.786 | 3.791  |
| C | 5.203  | -3.21  | 3.178  |
| N | 4.224  | -3.062 | 2.107  |
| N | -5.049 | 2.152  | -0.305 |
| C | -6.167 | 2.408  | -1.212 |
| C | -5.577 | 3.415  | -2.235 |
| N | -4.192 | 2.976  | -2.364 |
| C | -6.578 | 1.057  | -1.85  |
| C | -7.433 | 2.927  | -0.492 |

|   |        |        |        |
|---|--------|--------|--------|
| C | -5.566 | 4.869  | -1.699 |
| C | -6.312 | 3.456  | -3.591 |
| O | -3.963 | 2.13   | -3.351 |
| O | -5.119 | 2.721  | 0.885  |
| C | 6.16   | -0.811 | 2.986  |
| C | 5.807  | -1.75  | 5.237  |
| C | 4.66   | -4.265 | 4.174  |
| C | 6.558  | -3.747 | 2.671  |
| O | 4.732  | -2.788 | 0.919  |
| O | 3.202  | -1.306 | 4.814  |
| H | -4.195 | -0.22  | -0.712 |
| H | -2.527 | -1.957 | -0.821 |
| H | -1.214 | 2.705  | -1.482 |
| H | 1.172  | 1.968  | -1.802 |
| H | -0.105 | -2.646 | -1.157 |
| H | 1.456  | -2.836 | 0.81   |
| H | 3.749  | 0.549  | 1.961  |
| H | 2.764  | 1.831  | 0.175  |
| H | 0.729  | -3.239 | -3.48  |
| H | 1.754  | -2.528 | -5.587 |
| H | 2.396  | -0.195 | -5.914 |
| H | 2.019  | 1.446  | -4.136 |
| H | -7.462 | 1.164  | -2.517 |
| H | -5.767 | 0.583  | -2.442 |
| H | -6.86  | 0.319  | -1.064 |
| H | -7.825 | 2.174  | 0.229  |
| H | -7.259 | 3.858  | 0.089  |
| H | -8.246 | 3.145  | -1.22  |
| H | -6.589 | 5.304  | -1.659 |
| H | -5.125 | 4.958  | -0.682 |
| H | -4.966 | 5.53   | -2.364 |
| H | -5.83  | 4.183  | -4.284 |
| H | -6.319 | 2.477  | -4.118 |
| H | -7.373 | 3.766  | -3.463 |
| H | 7.237  | -1.08  | 3.058  |
| H | 5.899  | -0.756 | 1.909  |
| H | 6.066  | 0.227  | 3.38   |
| H | 5.82   | -0.711 | 5.637  |
| H | 5.207  | -2.354 | 5.951  |
| H | 6.85   | -2.138 | 5.282  |
| H | 5.395  | -4.492 | 4.979  |
| H | 3.711  | -3.958 | 4.664  |
| H | 4.451  | -5.228 | 3.655  |
| H | 6.445  | -4.763 | 2.228  |

|   |       |        |       |
|---|-------|--------|-------|
| H | 7.019 | -3.111 | 1.885 |
| H | 7.295 | -3.823 | 3.502 |

**2,7-TP-NN (singlet)**

Symbolic Z-matrix:

Charge = 0 Multiplicity = 1

|   |        |        |        |
|---|--------|--------|--------|
| C | -2.404 | 1.86   | 1.399  |
| C | -2.674 | 0.557  | 1.183  |
| C | -1.66  | -0.324 | 1.293  |
| C | -0.426 | 0.083  | 1.62   |
| C | -0.179 | 1.388  | 1.838  |
| C | -1.171 | 2.28   | 1.725  |
| C | 1.258  | 1.71   | 2.203  |
| C | 0.781  | -0.823 | 1.781  |
| C | 2.066  | 1.092  | 1.077  |
| C | 1.821  | -0.213 | 0.859  |
| C | 2.475  | -0.869 | -0.11  |
| C | 3.382  | -0.239 | -0.882 |
| C | 3.618  | 1.066  | -0.643 |
| C | 2.969  | 1.734  | 0.324  |
| C | 1.54   | 0.807  | 3.39   |
| C | 1.294  | -0.5   | 3.173  |
| C | 1.502  | -1.399 | 4.146  |
| C | 1.959  | -0.984 | 5.338  |
| C | 2.205  | 0.319  | 5.555  |
| C | 1.997  | 1.22   | 4.582  |
| C | 4.1    | -1.029 | -1.97  |
| C | -4.06  | 0.042  | 0.815  |
| N | 5.365  | -0.424 | -2.363 |
| C | 5.511  | -0.762 | -3.774 |
| C | 4.046  | -0.551 | -4.254 |
| N | 3.294  | -1.194 | -3.179 |
| N | -4.915 | 1.081  | 0.256  |
| C | -6.262 | 0.717  | 0.681  |
| C | -5.973 | 0.254  | 2.137  |
| N | -4.767 | -0.55  | 1.95   |
| C | -7.201 | 1.933  | 0.569  |
| C | -6.852 | -0.419 | -0.188 |
| C | -7.085 | -0.613 | 2.76   |
| C | -5.735 | 1.449  | 3.092  |
| O | -4.06  | -0.728 | 3.051  |
| O | -4.756 | 1.269  | -1.042 |
| C | 6.546  | 0.167  | -4.434 |
| C | 5.986  | -2.221 | -3.981 |
| C | 3.714  | -1.23  | -5.598 |

|   |        |        |        |
|---|--------|--------|--------|
| C | 3.692  | 0.948  | -4.401 |
| O | 2.033  | -0.811 | -3.096 |
| O | 6.388  | -0.749 | -1.594 |
| H | -3.193 | 2.623  | 1.315  |
| H | -1.839 | -1.398 | 1.123  |
| H | -0.973 | 3.35   | 1.901  |
| H | 1.46   | 2.786  | 2.381  |
| H | 0.578  | -1.899 | 1.602  |
| H | 2.257  | -1.937 | -0.272 |
| H | 4.355  | 1.627  | -1.239 |
| H | 3.175  | 2.802  | 0.502  |
| H | 1.3    | -2.467 | 3.966  |
| H | 2.133  | -1.717 | 6.143  |
| H | 2.58   | 0.651  | 6.538  |
| H | 2.197  | 2.289  | 4.759  |
| H | -8.176 | 1.735  | 1.068  |
| H | -6.761 | 2.85   | 1.019  |
| H | -7.415 | 2.182  | -0.495 |
| H | -6.91  | -0.129 | -1.261 |
| H | -6.261 | -1.36  | -0.139 |
| H | -7.894 | -0.661 | 0.12   |
| H | -8.06  | -0.077 | 2.765  |
| H | -7.224 | -1.576 | 2.22   |
| H | -6.842 | -0.883 | 3.813  |
| H | -5.425 | 1.116  | 4.108  |
| H | -4.949 | 2.144  | 2.728  |
| H | -6.665 | 2.04   | 3.242  |
| H | 6.538  | 0.058  | -5.542 |
| H | 6.371  | 1.238  | -4.19  |
| H | 7.577  | -0.065 | -4.081 |
| H | 6.978  | -2.405 | -3.511 |
| H | 5.284  | -2.974 | -3.562 |
| H | 6.117  | -2.451 | -5.062 |
| H | 4.39   | -0.876 | -6.408 |
| H | 3.792  | -2.338 | -5.544 |
| H | 2.668  | -1.011 | -5.912 |
| H | 2.616  | 1.101  | -4.643 |
| H | 3.901  | 1.535  | -3.482 |
| H | 4.256  | 1.418  | -5.237 |

**2,7-TP-NN (triplet)**

Symbolic Z-matrix:

Charge = 0 Multiplicity = 3

|   |        |       |       |
|---|--------|-------|-------|
| C | -2.404 | 1.86  | 1.399 |
| C | -2.674 | 0.557 | 1.183 |

|   |        |        |        |
|---|--------|--------|--------|
| C | -1.66  | -0.324 | 1.293  |
| C | -0.426 | 0.083  | 1.62   |
| C | -0.179 | 1.388  | 1.838  |
| C | -1.171 | 2.28   | 1.725  |
| C | 1.258  | 1.71   | 2.203  |
| C | 0.781  | -0.823 | 1.781  |
| C | 2.066  | 1.092  | 1.077  |
| C | 1.821  | -0.213 | 0.859  |
| C | 2.475  | -0.869 | -0.11  |
| C | 3.382  | -0.239 | -0.882 |
| C | 3.618  | 1.066  | -0.643 |
| C | 2.969  | 1.734  | 0.324  |
| C | 1.54   | 0.807  | 3.39   |
| C | 1.294  | -0.5   | 3.173  |
| C | 1.502  | -1.399 | 4.146  |
| C | 1.959  | -0.984 | 5.338  |
| C | 2.205  | 0.319  | 5.555  |
| C | 1.997  | 1.22   | 4.582  |
| C | 4.1    | -1.029 | -1.97  |
| C | -4.06  | 0.042  | 0.815  |
| N | 5.365  | -0.424 | -2.363 |
| C | 5.511  | -0.762 | -3.774 |
| C | 4.046  | -0.551 | -4.254 |
| N | 3.294  | -1.194 | -3.179 |
| N | -4.915 | 1.081  | 0.256  |
| C | -6.262 | 0.717  | 0.681  |
| C | -5.973 | 0.254  | 2.137  |
| N | -4.767 | -0.55  | 1.95   |
| C | -7.201 | 1.933  | 0.569  |
| C | -6.852 | -0.419 | -0.188 |
| C | -7.085 | -0.613 | 2.76   |
| C | -5.735 | 1.449  | 3.092  |
| O | -4.06  | -0.728 | 3.051  |
| O | -4.756 | 1.269  | -1.042 |
| C | 6.546  | 0.167  | -4.434 |
| C | 5.986  | -2.221 | -3.981 |
| C | 3.714  | -1.23  | -5.598 |
| C | 3.692  | 0.948  | -4.401 |
| O | 2.033  | -0.811 | -3.096 |
| O | 6.388  | -0.749 | -1.594 |
| H | -3.193 | 2.623  | 1.315  |
| H | -1.839 | -1.398 | 1.123  |
| H | -0.973 | 3.35   | 1.901  |
| H | 1.46   | 2.786  | 2.381  |

|   |        |        |        |
|---|--------|--------|--------|
| H | 0.578  | -1.899 | 1.602  |
| H | 2.257  | -1.937 | -0.272 |
| H | 4.355  | 1.627  | -1.239 |
| H | 3.175  | 2.802  | 0.502  |
| H | 1.3    | -2.467 | 3.966  |
| H | 2.133  | -1.717 | 6.143  |
| H | 2.58   | 0.651  | 6.538  |
| H | 2.197  | 2.289  | 4.759  |
| H | -8.176 | 1.735  | 1.068  |
| H | -6.761 | 2.85   | 1.019  |
| H | -7.415 | 2.182  | -0.495 |
| H | -6.91  | -0.129 | -1.261 |
| H | -6.261 | -1.36  | -0.139 |
| H | -7.894 | -0.661 | 0.12   |
| H | -8.06  | -0.077 | 2.765  |
| H | -7.224 | -1.576 | 2.22   |
| H | -6.842 | -0.883 | 3.813  |
| H | -5.425 | 1.116  | 4.108  |
| H | -4.949 | 2.144  | 2.728  |
| H | -6.665 | 2.04   | 3.242  |
| H | 6.538  | 0.058  | -5.542 |
| H | 6.371  | 1.238  | -4.19  |
| H | 7.577  | -0.065 | -4.081 |
| H | 6.978  | -2.405 | -3.511 |
| H | 5.284  | -2.974 | -3.562 |
| H | 6.117  | -2.451 | -5.062 |
| H | 4.39   | -0.876 | -6.408 |
| H | 3.792  | -2.338 | -5.544 |
| H | 2.668  | -1.011 | -5.912 |
| H | 2.616  | 1.101  | -4.643 |
| H | 3.901  | 1.535  | -3.482 |
| H | 4.256  | 1.418  | -5.237 |
